# Supplementary material for: Calendar effects on surface air temperature and precipitation based on model-ensemble equilibrium and transient simulations from PMIP4 and PACMEDY
Source: Copernicus journal article supplement (doi:10.5194/cp-2021-163), 2021-11-29
Supplement: Supplementary file 1 [file cp-2021-163-supplement.pdf]

## Supplementary figures

Xiaoxu Shi<sup>1</sup>, Martin Werner<sup>1</sup>, Carolin Krug<sup>1,2</sup>, Chris M. Brierley<sup>3</sup>, Anni Zhao<sup>3</sup>, Endurance Igbinosa<sup>1,2</sup>, Pascale Braconnot<sup>4</sup>, Esther Brady<sup>5</sup>, Jian Cao<sup>6</sup>, Roberta D'Agostino<sup>7</sup>, Johann Jungclaus<sup>7</sup>, Xingxing Liu<sup>8</sup>, Bette Otto-Bliesner<sup>5</sup>, Dmitry Sidorenko<sup>1</sup>, Robert Tomas<sup>5</sup>, Evgeny M. Volodin<sup>9</sup>, Hu Yang<sup>1</sup>, Qiong Zhang<sup>10</sup>, Weipeng Zheng<sup>11</sup>, and Gerrit Lohmann<sup>1,2</sup>

<sup>1</sup>Alfred Wegener Institute, Helmholtz Center for Polar and Marine Research, Bremerhaven, Germany

<sup>2</sup>Bremen University, Bremen, Germany

<sup>3</sup>Dept. of Geography, University College London, London, UK

<sup>4</sup>Laboratoire des Sciences du Climat et de l'Environnement-IPSL, Unité Mixte CEA-CNRS-UVSQ, Université Paris-Saclay, Orme des Merisiers, Gif-sur-Yvette, France

<sup>5</sup>Climate and Global Dynamics Laboratory, National Center for Atmospheric Research (NCAR), Boulder, CO 80305, USA

<sup>6</sup>School of Atmospheric Sciences, Nanjing University of Information Science & Technology, Nanjing, 210044, China

<sup>7</sup>Max Planck Institute for Meteorology, Hamburg, Germany

<sup>8</sup>State Key Laboratory of Loess and Quaternary Geology, Institute of Earth Environment, Chinese Academy of Sciences, Xi'an, 710061, China

<sup>9</sup>Marchuk Institute of Numerical Mathematics, Russian Academy of Sciences, ul. Gubkina 8, Moscow, 119333, Russia

<sup>10</sup>Department of Physical Geography and Bolin Centre for Climate Research, Stockholm University, 10691, Stockholm, Sweden

<sup>11</sup>LASG, Institute of Atmospheric Physics, Chinese Academy of Sciences, Beijing, 100029, China

**Correspondence:** Xiaoxu Shi (xiaoxu.shi@awi.de)

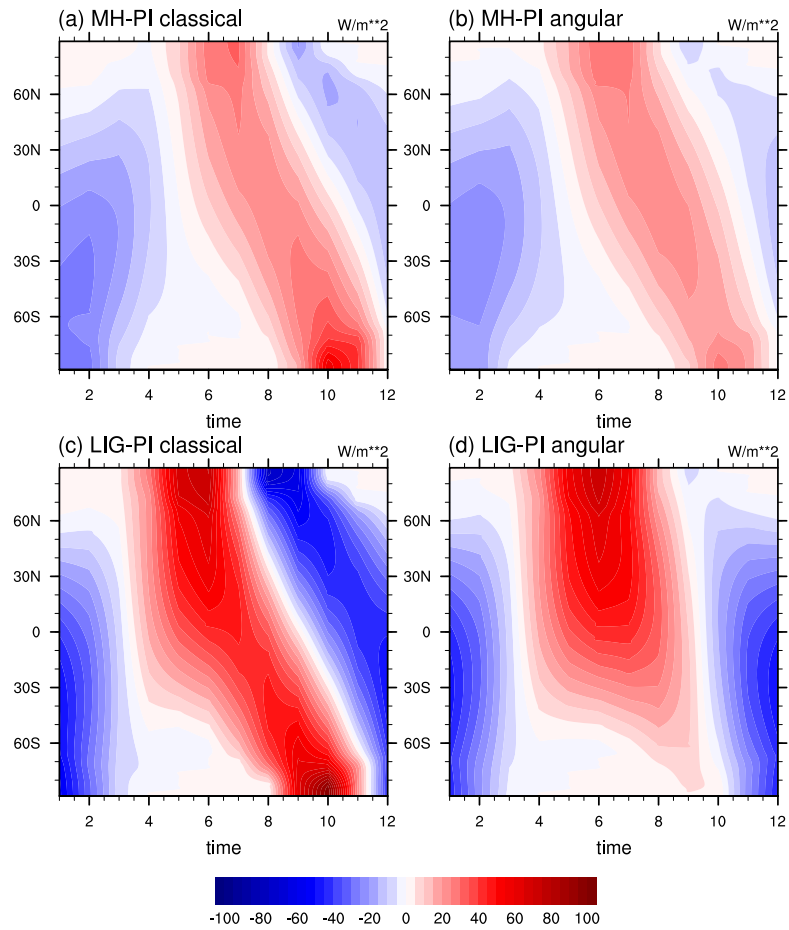

**Figure S1.** Insolation anomalies relative to PI in (a-b) MH and (c-d) LIG in classical and angular calendar.

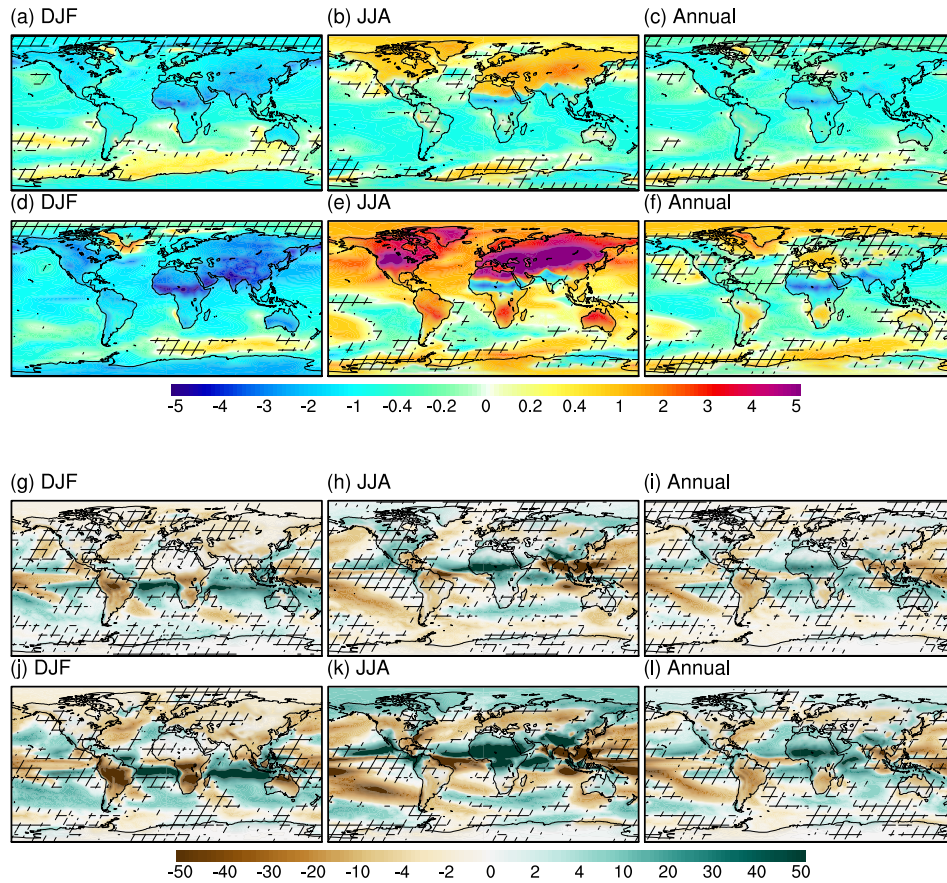

**Figure S2.** (a-c) Anomalies of surface air temperature between MH and PI for (a) DJF, (b) JJA, and (c) annual mean. Units: K. (d-f) As in a-c, but for anomalies of surface air temperature between LIG and PI. (g-l) As in a-d, but for precipitation. The unmarked area indicates that at least 7 out of the 9 models show the same sign. Units: mm/month.

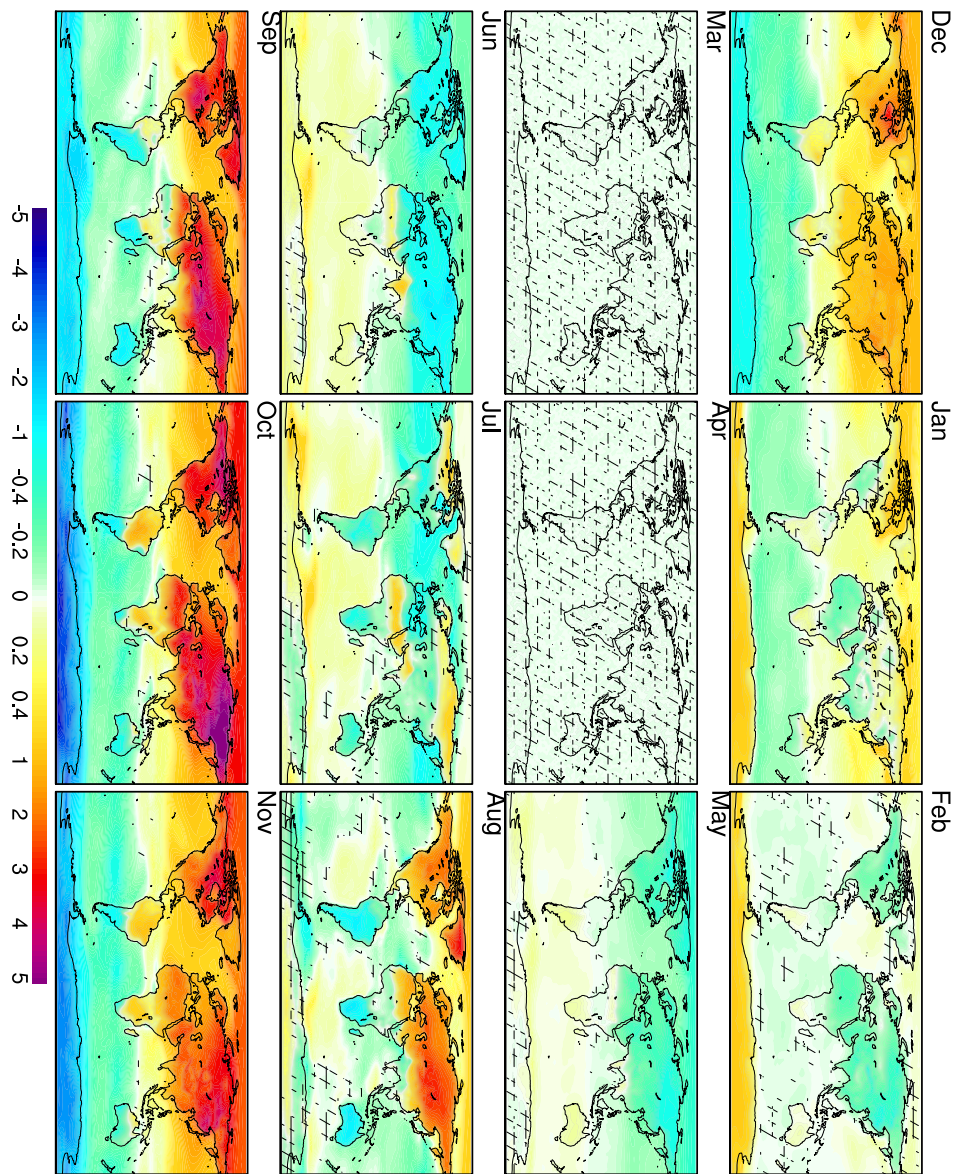

**Figure S3.** Anomalies of surface air temperature between angular and classical means in LIG for each month. The unmarked area indicates that at least 7 out of the 9 models show the same sign. Units: K.

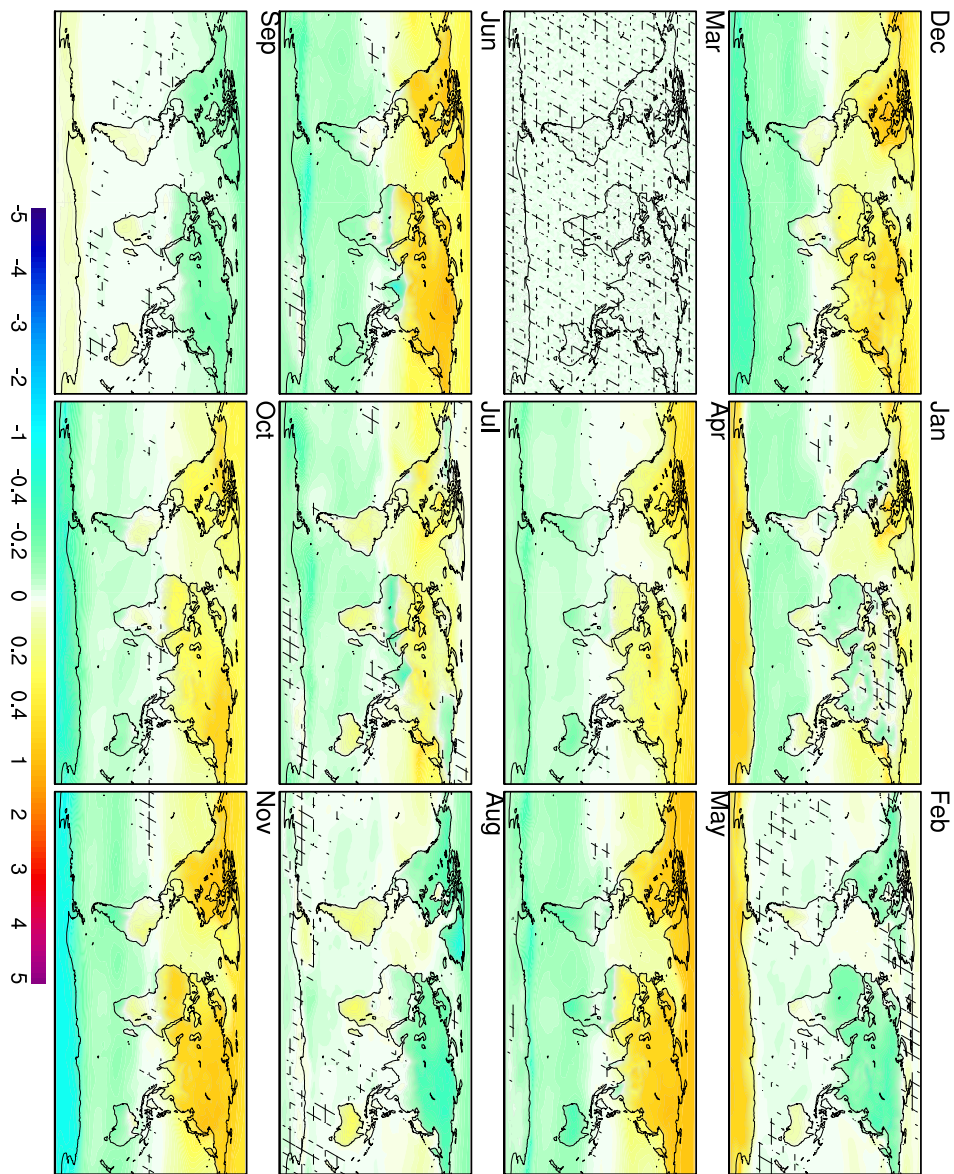

**Figure S4.** Anomalies of surface air temperature between angular and classical means in MH for each month. The unmarked area indicates that at least 7 out of the 9 models show the same sign. Units: K.

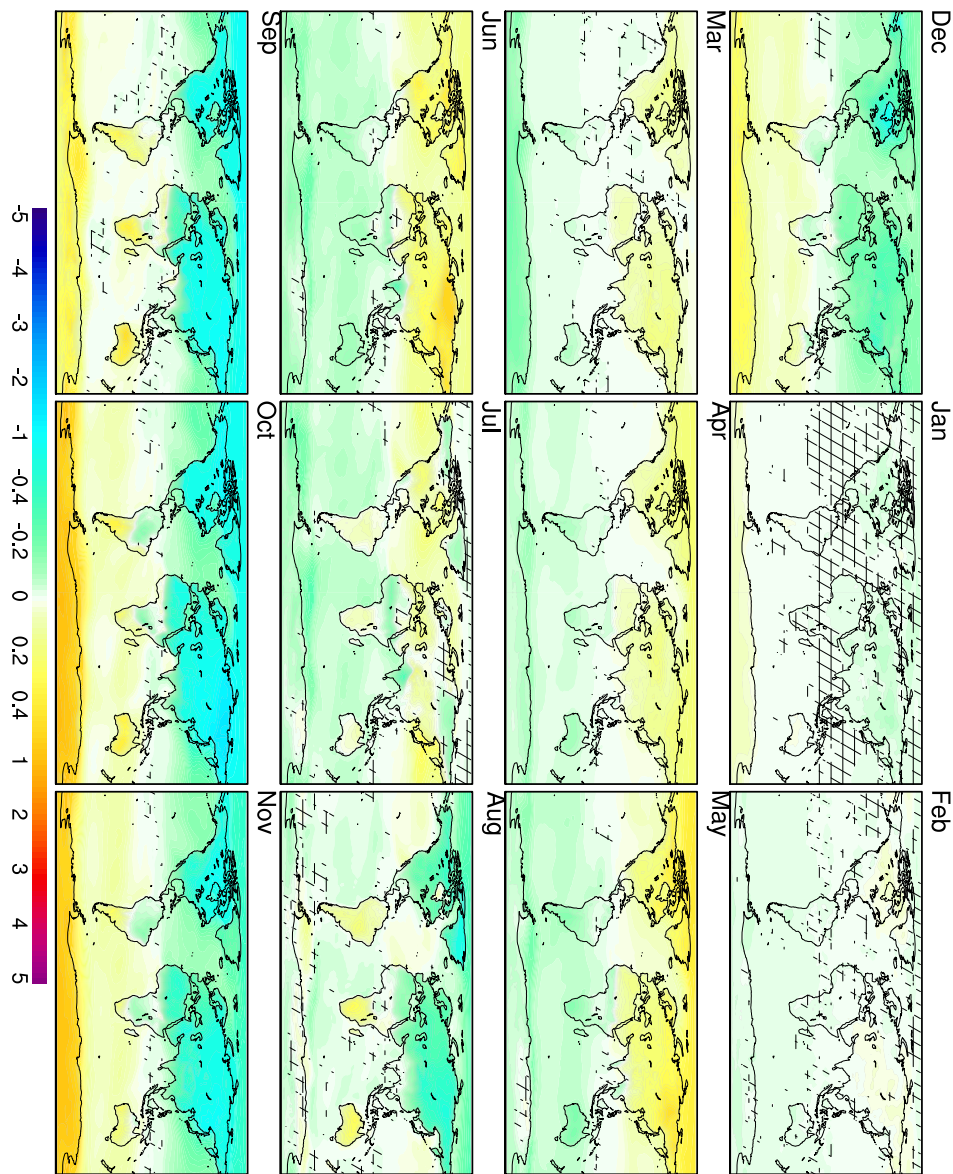

**Figure S5.** Anomalies of surface air temperature between angular and classical means in PI for each month. The unmarked area indicates that at least 7 out of the 9 models show the same sign. Units: K.

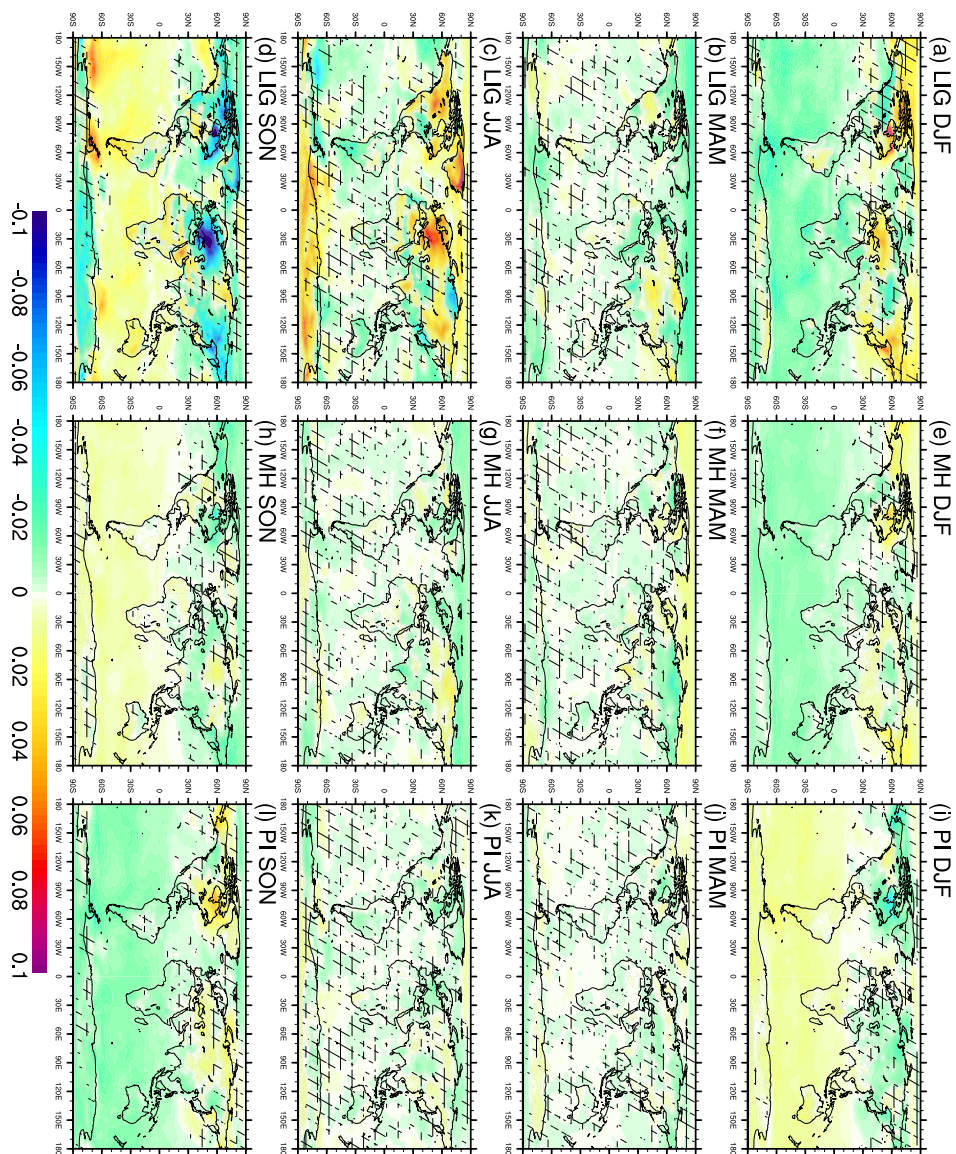

**Figure S6.** Anomalies of surface air temperature between day-length adjusted values and month-length adjusted values. The unmarked area indicates that at least 7 out of the 9 models show the same sign. Units: K.

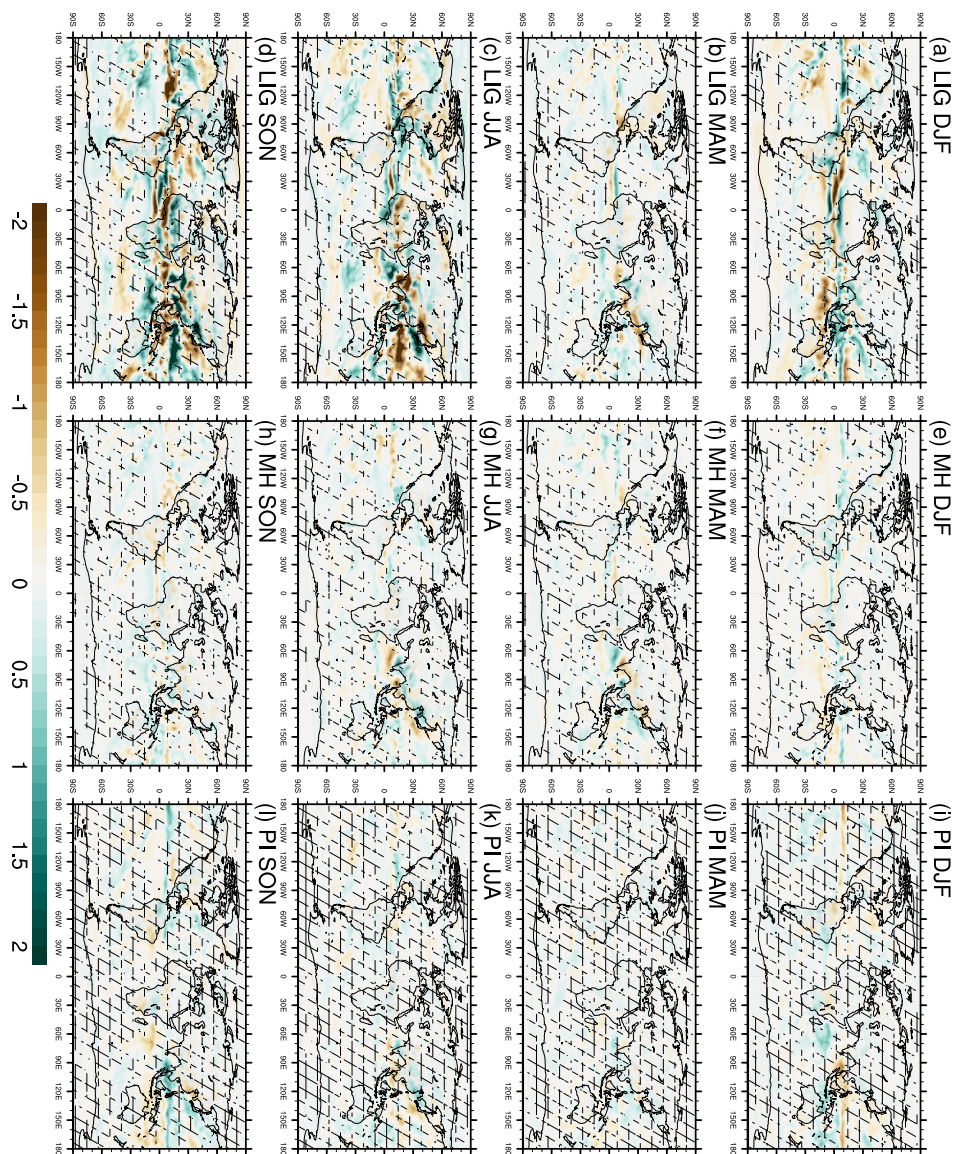

**Figure S7.** Anomalies of precipitation between day-length adjusted values and month-length adjusted values. The unmarked area indicates that at least 7 out of the 9 models show the same sign. Units: K.
